# Supplementary material for: Detecting Coppice Legacies from Tree Growth
Source: PLoS One. 2016 Jan 19;11(1):e0147205. doi: 10.1371/journal.pone.0147205 (PMC4718612; doi:10.1371/journal.pone.0147205)
Supplement: S4 Table — DWBA = distance-weighted basal area. Values in bold are significant at p < 0.05. (XLSX) [file pone.0147205.s005.xlsx]

## Sheet: S4 Table
S4 Table. Differences in competition of neighboring trees up to 10 m from the cored standards (ANOVA followed by Tukey HSD test).
DWBA = distance-weighted basal area. Values in bold are significant at p < 0.05
Variable: number of neighbouring stems
Study site	Kobyla (M=35.714)	Koda (M=51.644)	Mramor I. (M=42.133)	Mramor II. (M=37.857)	Mramor III. (M=35.444)
Kobyla		0.000796	0.692779	0.993182	0.999998
Koda	0.000796		0.194652	0.021662	0.001324
Mramor I	0.692779	0.194652		0.933973	0.686674
Mramor II	0.993182	0.021662	0.933973		0.990497
Mramor III	0.999998	0.001324	0.686674	0.990497
Variable: DWBA
Study site	Kobyla (M=1406,0)	Koda (M=1705,4)	Mramor I (M=1281,4)	Mramor II (M=1351,1)	Mramor III (M=1482,0)
Kobyla		0.00584994	0.78382	0.987907	0.948214
Koda	0.00584994		0.000334928	0.00456994	0.102109
Mramor I	0.78382	0.000334928		0.977671	0.391408
Mramor II	0.987907	0.00456994	0.977671		0.785512
Mramor III	0.948214	0.102109	0.391408	0.785512
